# Supplementary material
Source: PubMed Central journal article supplement (PMC4016801)
Supplement: NIHMS575944-supplement-supplement_1.pdf [file NIHMS575944-supplement-supplement_1.pdf]

Quantification of tube formation (F) and chemotaxis assay using Boyden chambers (G) of HUVECs incubated with microparticles isolated from MCS-fed mice (control diet) and MCD-fed mice treated with VNN1 siRNA, control siRNA, or PBS (mock) (n = 5 mice per group). VEGF was used as a positive control, and serum-free medium as a negative control. Values in (C), (E), (F), and (G) represent means  $\pm$  SD from three independent experiments. \*P < 0.05; \*\*P < 0.01; \*\*\*P < 0.001, Kruskal-Wallis with Bonferroni correction.

**Supplemental Figure 1. HepG2 exposed to different saturated and unsaturated free fatty acids.** Representative micrographs of Oil red-O staining for lipid droplets in HepG2 exposed to 1% BSA (control) or 0.25 mM of oleic, palmitic and stearic acid for 24 h. 20X magnification was used for acquisition of the pictures.

**Supplemental Figure 2. Effect of lipotoxic FFAs is counteracted by non-lipotoxic FFAs.** HepG2 were exposed to 0.25 mM of palmitic acid, oleic acid and a mixture of both up to 24 hrs. MPs were isolated from the supernatant and Annexin V+ positive MPs were detected by flow cytometry and quantity is reported in the graph. Values represent mean  $\pm$  S.D. \* P < 0.05; \*\* P < 0.01; \*\*\*P < 0.001 compared to controls.

Supplemental Figure 3. Cellular localization and molecular function of proteins from hepatocyte-derived MPs. All the proteins obtained by three different proteomics analysis of MPs from HepG2 cells exposed to palmitic acid were organized based on cellular localization (top pie chart) and molecular function (bottom pie chart). Percentages over the total number of proteins were reported in the pie charts.

Supplemental Figure 4. MPs released by fat-laden rat primary hepatocytes are potent inducers of angiogenesis. (A) Representative micrographs of tube formation of HUVECs after exposure up to 6 h to rat primary hepatocytes-derived MPs, MP-free supernatant or controls. (B) HUVECs total tube

length has been measured and reported in the histogram. (C) Representative micrographs of chemotaxis assay (Boyden's chamber assay) of HUVECs were tested with primary hepatocytes-derived MPs, MP-free supernatant or controls, as described in Methods. A 10X magnification was used for microscopic pictures. (D) An average of HUVECs migrated into the filter was measured and reported in the graph. VEGF (100 ng/ml) was used as a positive control. Values represent mean  $\pm$  S.D. from three independent experiments. \*  $P < 0.05$ ; \*\*  $P < 0.01$ ; \*\*\* $P < 0.001$  compared to controls.

**Supplemental Figure 5. Pro-angiogenic effect of hepatocytes-derived MPs is dose-dependent.**

HepG2 were treated with 0.25 mM of palmitic acid up to 24 h and MPs were isolated from the supernatant by ultracentrifugation. MPs samples were quantified by BCA protein assay and the concentration has been determined. Different doses (50, 125, 250 and 500  $\mu\text{g/mL}$ ) have been used for assessing (A) HUVECs tube formation and (B) chemotaxis assay (Boyden's chamber assay). Quantification graphs are reported in the figure. A dose of 100 ng/mL of VEGF has been used as positive control. Values represent mean  $\pm$  S.D. \*  $P < 0.05$ ; \*\*  $P < 0.01$ ; \*\*\* $P < 0.001$  compared to controls.

Supplemental Figure 6. Endothelial cells angiogenesis in vitro depends on internalization of MPs into HUVECs. Representative micrographs of tube formation of HUVECs after exposure to HepG2-derived MPs<sup>Calcein</sup> up to 6 hours. HUVECs tubes were detected by an Olympus FV1000 Spectral Confocal with 20X lens.

**Supplemental Figure 7. Genetic suppression of VNN1 expression on MPs significantly reduced the pro-angiogenic effects of MPs on endothelial cell migration and tube formation.**

HepG2 were exposed to palmitic acid (PA) for 24 h and then treated with VNN1 siRNA or control RNA (Ctrl RNA). Representative micrographs of (A) tube formation and (B) chemotaxis (Boyden's chamber assay) of HUVECs treated with hepatocyte-derived MPs, MP-free supernatant (MP-free

sup.) or controls for 6 h and 16 h, respectively. A dose of 100 ng/mL of VEGF was used as positive control. A 4X magnification was used for acquisition of pictures.

**Supplemental Figure 8. Pro-angiogenic effect of hepatocytes-derived microparticles acts through VNN1-dependent internalization.** (A) Fat-laden HepG2-derived MPs were stained with 1  $\mu$ M of Calcein AM-FITC (MPs<sup>Calcein</sup>), washed to removed unspecific bound and incubated with or without a neutralizing antibody anti-VNN1 (4  $\mu$ g/mL) (VNN1 nAb) and anti-GAPDH for 30 minutes. MPs were then incubated with HUVECs for 6 hours and FITC-positive events were detected by FACS. (B) Number of FITC-positive HUVECs exposed to MP<sup>Calcein</sup> with or without VNN1 were reported in graph; (C) tube formation of HUVECs after exposure for 6 hours to HepG2-derived MPs with or without VNN1 or controls; (D) chemotaxis assay of HUVECs was performed with HepG2-derived MPs with or without VNN1 or controls as described in Methods. (E) Protein expression of endothelial cells markers activation, ICAM-1 and VCAM-1, after exposure up to 6 hours with hepatocytes-derived MPs or MPs pre-incubated with a VNN1 neutralizing antibody. GAPDH was used as loading control. (F) Glutathione activity assay analysis in HUVECs treated with HepG2-derived MPs with or without VNN1 or controls. Glutathione activity is reported in RFU. \* P < 0.05; \*\* P < 0.01; \*\*\*P < 0.001, compared to controls.

**Supplemental Figure 9. Proangiogenic effects of VNN1 positive MPs are not mediated by induction of endothelial cell proliferation or modulation of PPAR- $\gamma$  expression.** Fat-laden HepG2-derived MPs were incubated with or without a rabbit polyclonal antibody anti-VNN1 (4  $\mu$ g/mL) for 30 minutes. A BrdU proliferation assay has been performed with HUVECs incubated for 16 h with MPs, MPs and VNN1 neutralizing Ab or controls. (A) Flow cytometry analysis gating (P3) proliferating-FITC-positive HUVECs. A BrdU negative staining has been included as negative control. (B) RNA was isolated from HUVECs that were incubated for 16 h with MPs, MPs and VNN1 nAb or controls in order to determine the expression of PPAR- $\gamma$  by quantitative PCR. The

housekeeping gene 18S was used as an internal control. Values represent mean  $\pm$  S.D. \*  $P < 0.05$ ; \*\*  $P < 0.01$ ; \*\*\* $P < 0.001$  compared to controls.

**Supplemental Figure 10. Increase of VNN1 in hepatocytes during lipotoxicity is independent**

**of PPAR $\alpha$  and  $\gamma$ .** (A) Quantitative PCR of PPAR $\gamma$  expression in HepG2 treated with 0.25 mM of palmitic acid (PA) or 1% BSA (vehicle) for 24 h. (B) Quantitative PCR for PPAR $\alpha$  and (C) VNN1 in HepG2 treated with 1% BSA, 0.25 mM of palmitic acid (PA), oleic acid (OA) or palmitic acid/oleic acid mix for 24 h. (D) Quantitative PCR for PPAR $\alpha$  and (E) VNN1 in HepG2 exposed to 1% BSA, 0.25 mM of palmitic acid (PA), oleic acid (OA) or palmitic acid/oleic acid mix for 24 h and treated with PPAR $\alpha$  siRNA or control RNA (Ctrl RNA).

**Supplementary Figure 11. Release of circulating microparticles depends on the stage of**

**NASH.** C57/B6 mice (n=5) were put on a MCD, high fat/high carbohydrates (HF/HCarb) or chow diet for 6 weeks. (A) Circulating MPs were isolated as described in Methods and Annexin V+ MPs were detected by flow cytometry. (B) H-E staining. (C) NAFLD activity score. Values represent mean  $\pm$  S.D. \*  $P < 0.05$ ; \*\*  $P < 0.01$ ; \*\*\* $P < 0.001$  compared to controls.

**Supplementary Figure 12. Circulating MPs from mice with NASH stimulate angiogenesis ex**

**vivo.** C57/B6 mice were put on a MCD, high fat/high carbohydrates (HF/HCarb) and chow diet for 6 weeks, platelet-free plasma was harvested and MPs were isolated as described in Methods. MPs and MPs-free supernatant were used to induce HUVECs tube formation and oriented migration (Boyden's chamber assay) ex vivo. Quantification of (A) HUVECs tube formation (total tube length) and (B) chemotaxis assay (Boyden's chamber assay) is reported in the graph. A dose of 100 ng/mL of VEGF has been used as positive control. Values represent mean  $\pm$  S.D. \*  $P < 0.05$ ; \*\*  $P < 0.01$ ; \*\*\* $P < 0.001$  compared to controls.

**Supplemental Figure 13. Liver specific in vivo silencing of VNN1 does not affect VNN1**

**expression in other tissues.** Expression of VNN1 was assessed in (A) kidney, (B) intestine and (C)

spleen harvested from MCD-fed mice treated with VNN1 siRNA, control RNA (CTRL RNA) or PBS (Mock) to confirm the liver-specific knockdown of VNN1. The housekeeping gene 18S was used as an internal control. Values represent mean  $\pm$  S.D. \*  $P < 0.05$ ; \*\*  $P < 0.01$ ; \*\*\* $P < 0.001$  compared to controls.

**Supplemental Figure 14.** Casp3<sup>-/-</sup> mice are protected from MCD-induced pathological angiogenesis and liver fibrosis. (A) Representative micrographs for H-E staining, immunostaining for CD-31, vonWillebrand factor (vWF) and Sirius red staining of liver specimens harvested from WT and Caspase-3 KO mice fed the MCD or control diet (MCS) diet for 6 weeks. A 10X magnification was used for micrographs. (B) Total area in pixel (px) is reported in the graph to show the quantification of CD31 immunostaining. (C) Percentage of fibrosis was measured by using Image J. (C) RNA was isolated from liver samples of C57BL/6 Casp3<sup>-/-</sup> and WT mice, fed a MCD or MCS diet. Analysis of the transcripts for the pro-angiogenic genes (VEGF-B and FGF- $\beta$ ) and pro-fibrogenic genes (Collagen type I and  $\alpha$ -SMA) was assessed by quantitative PCR. The housekeeping gene 18S was used as an internal control. Values represent mean  $\pm$  S.D. \*  $P < 0.05$ ; \*\*  $P < 0.01$ ; \*\*\* $P < 0.001$  compared to controls.

Supplemental Table 1. Identification of the whole hepatocytes-derived microparticles proteins based on the LC-MS/MS-derived sequences. Pure hepatocytes-derived microparticles were isolated and processed for a complete proteomics analysis as described in the 'Methods' paragraph. The proteins detected are listed in the table with the corresponding uniprot accession code, number of peptides, biological function and cellular localization.

**1% BSA**

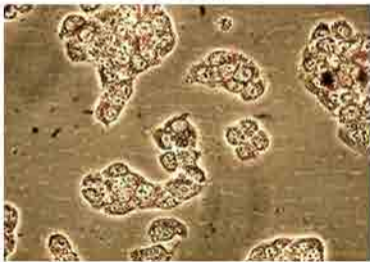

**0.25 mM Oleic acid**

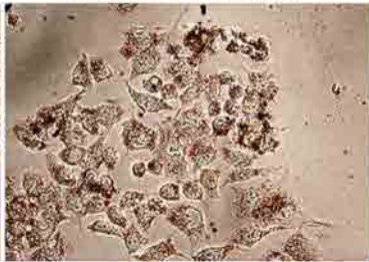

**0.25 mM Palmitic acid**

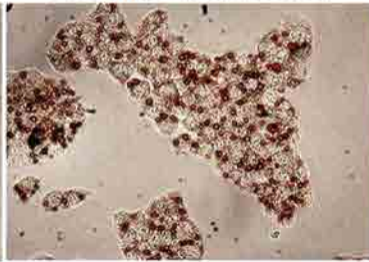

**0.25 mM Stearic acid**

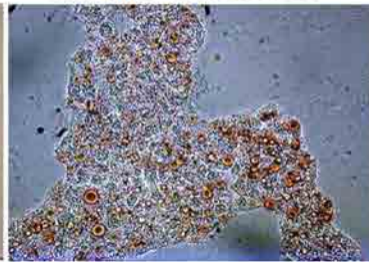

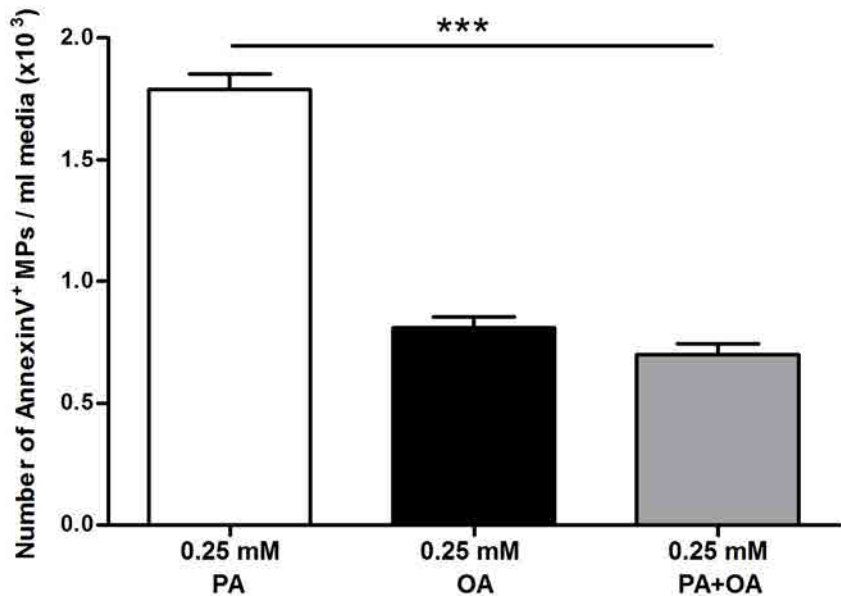

## Cellular localization

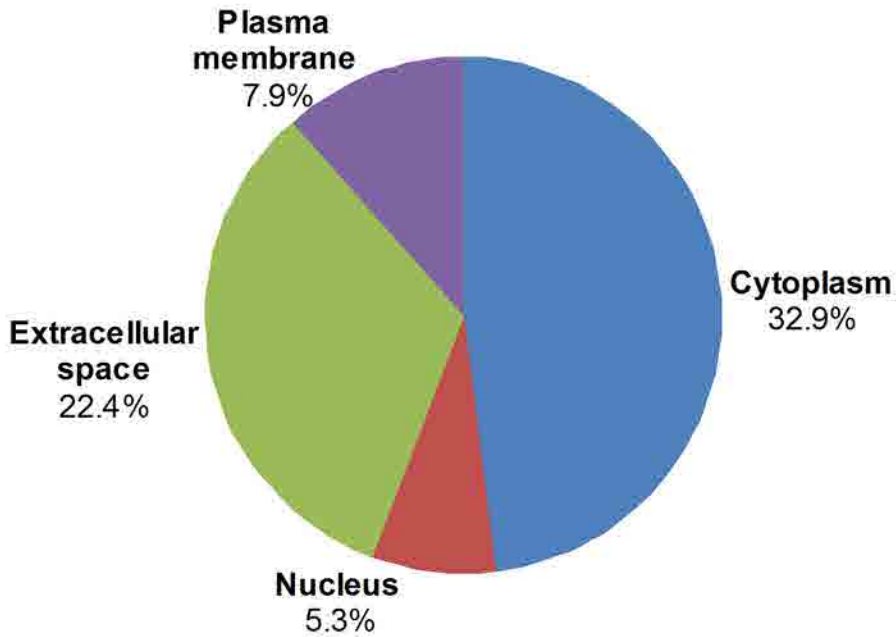

## Molecular function

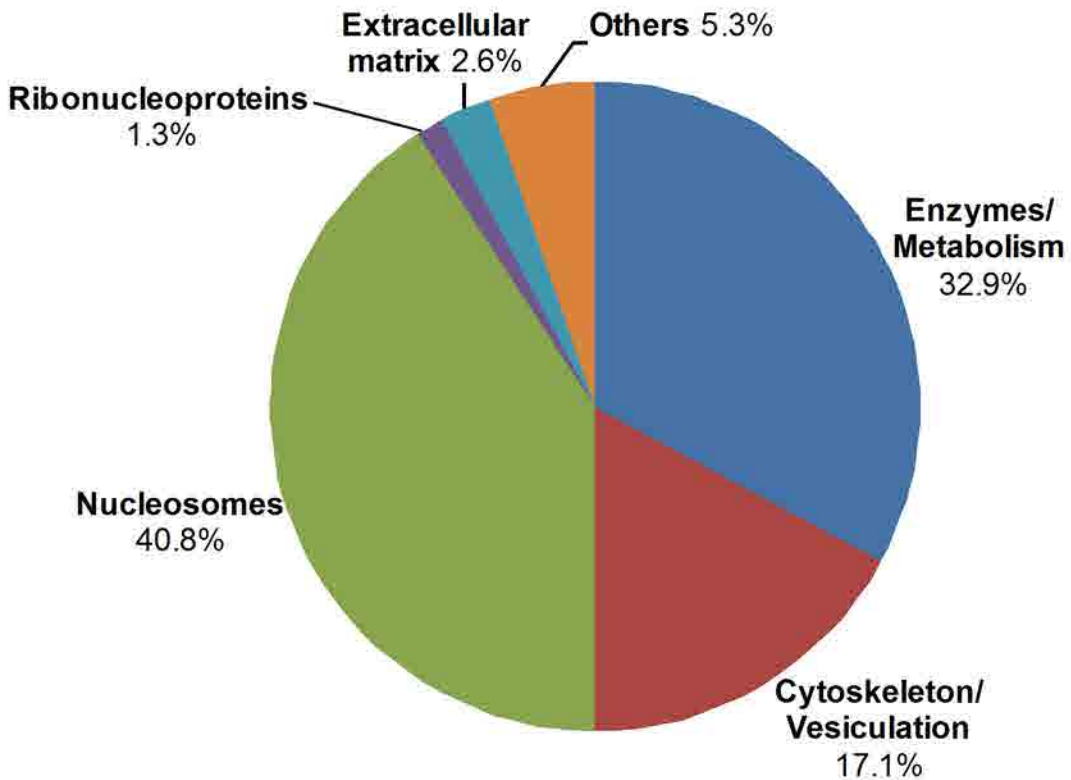



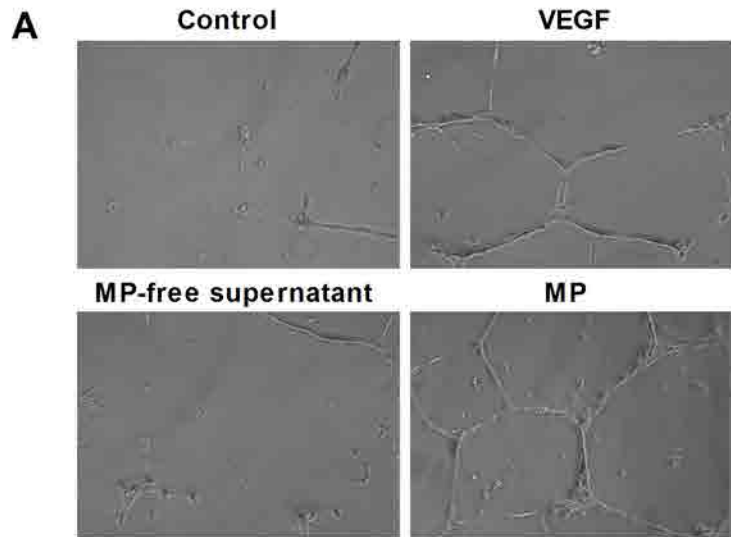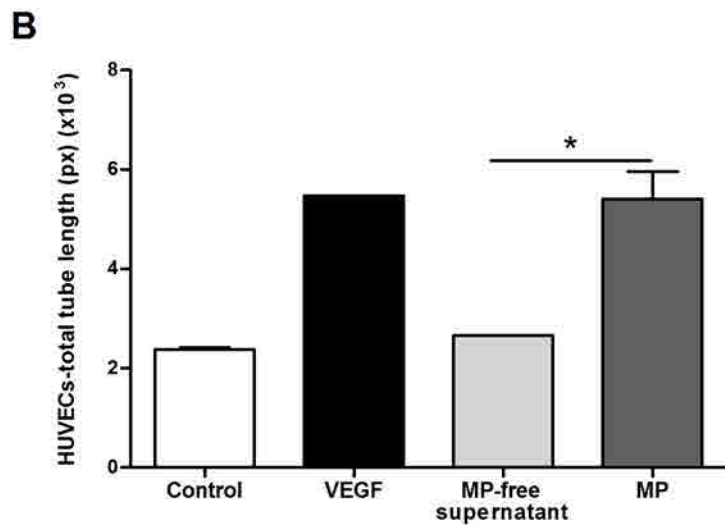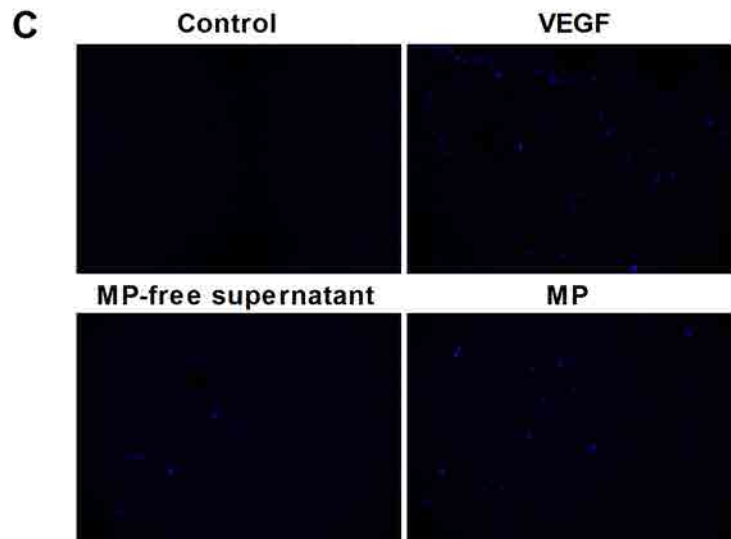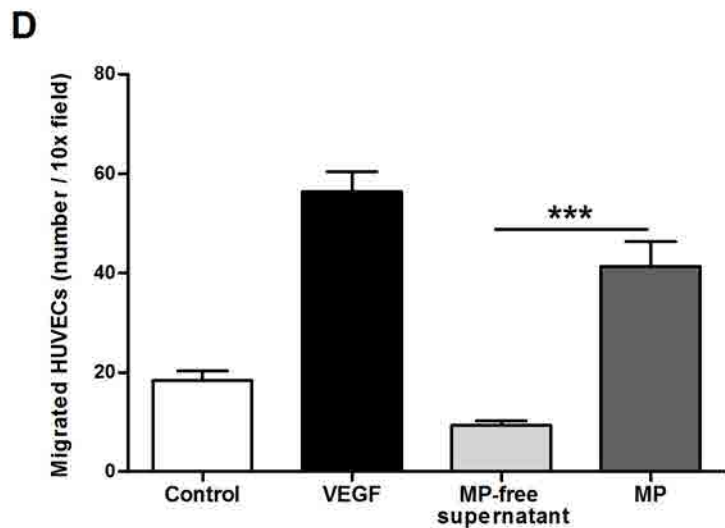

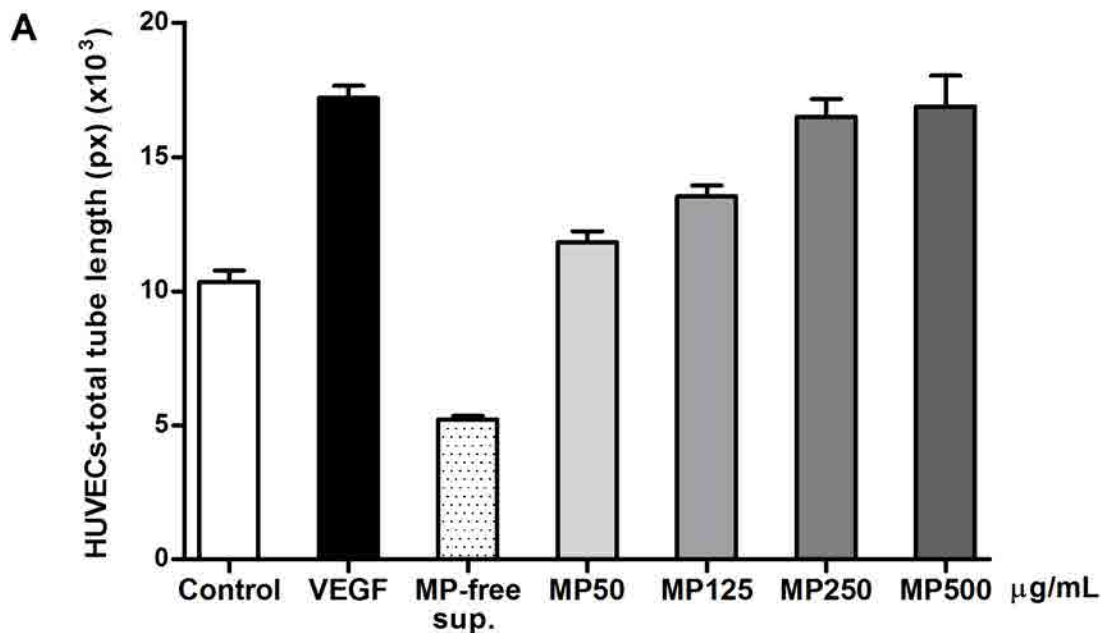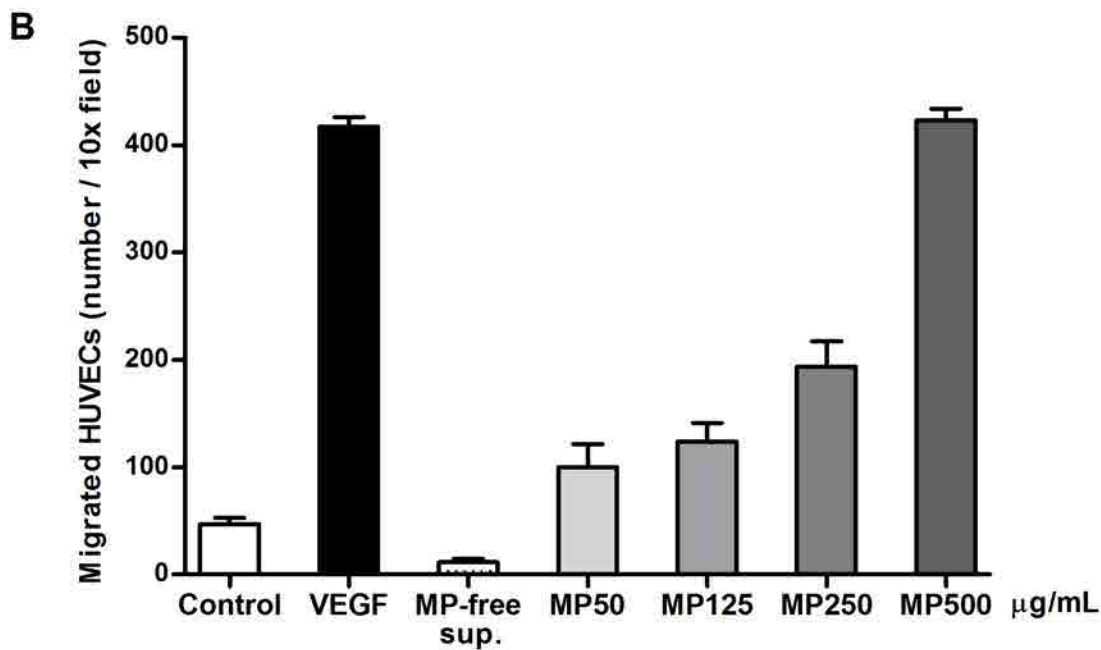

Calcein<sup>+</sup> HUVECs tubes after treatment with MPs <sup>Calcein</sup>

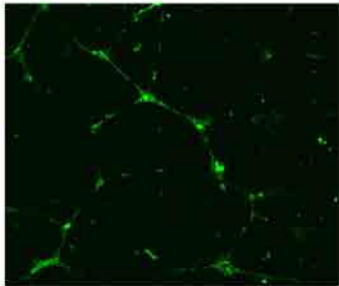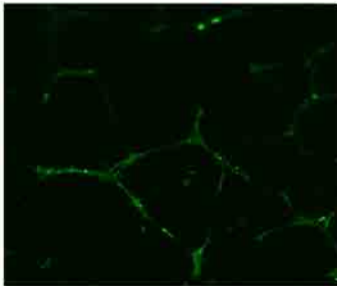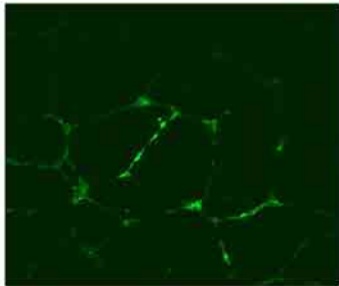

**A**

Control

VEGF

MP

MP-free sup.

MP Ctrl RNA

MPs VNN1 siRNA

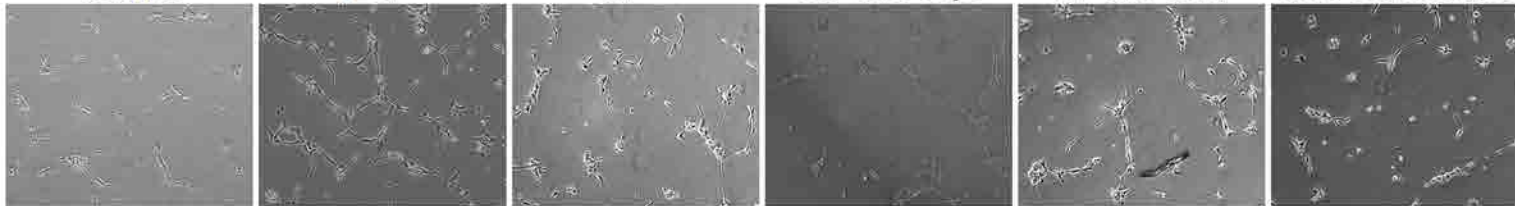**B**

Control

VEGF

MP

MP-free sup.

MP Ctrl RNA

MPs VNN1 siRNA

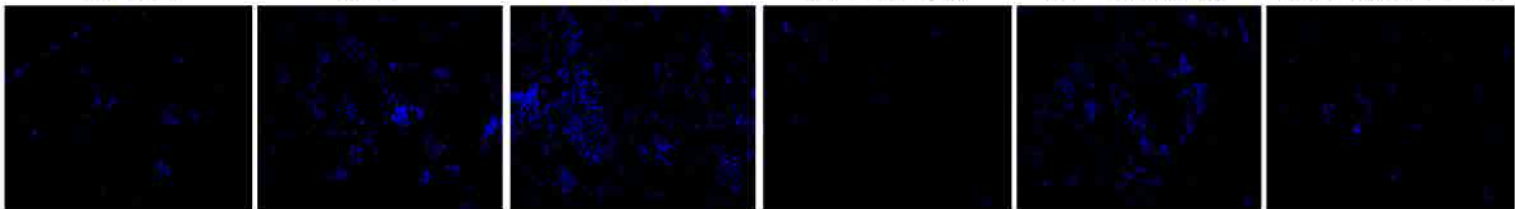

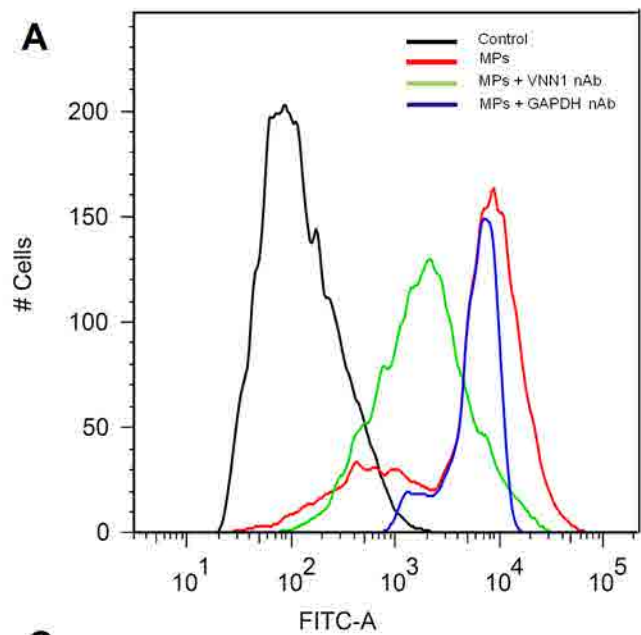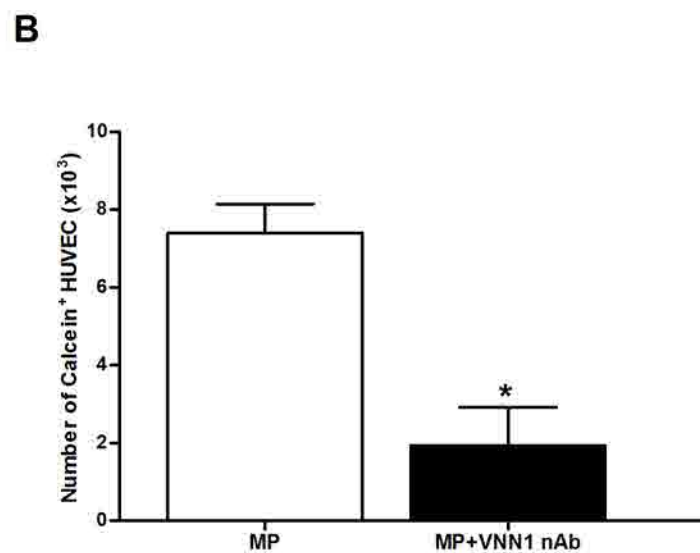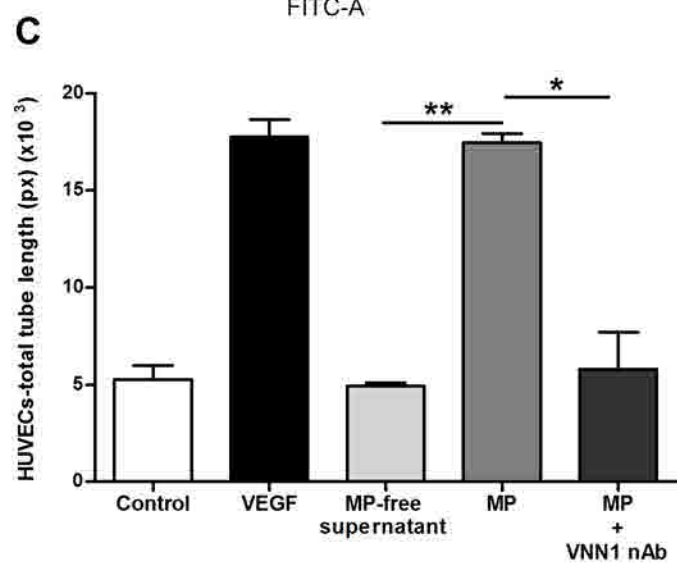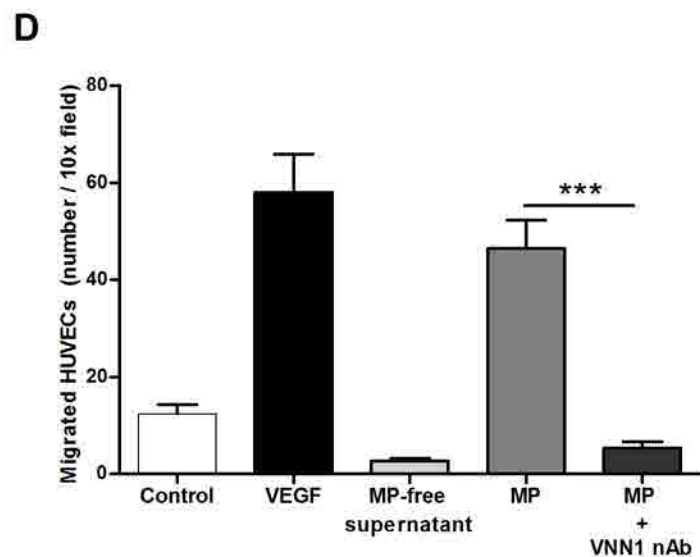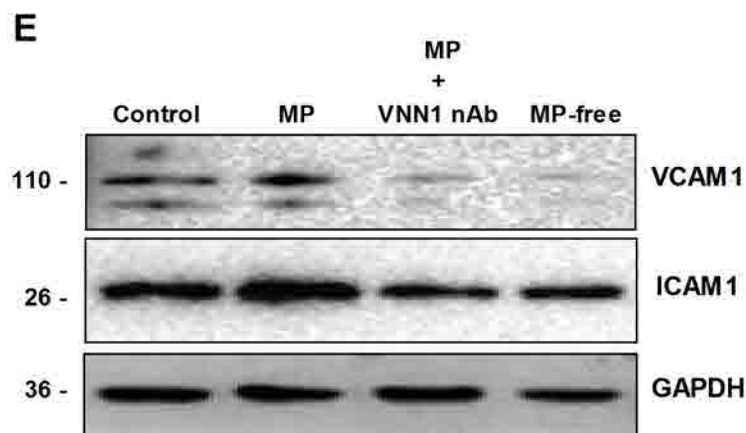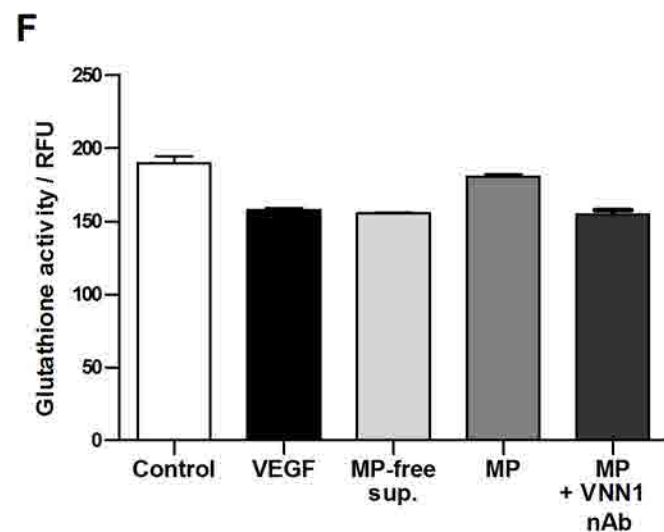

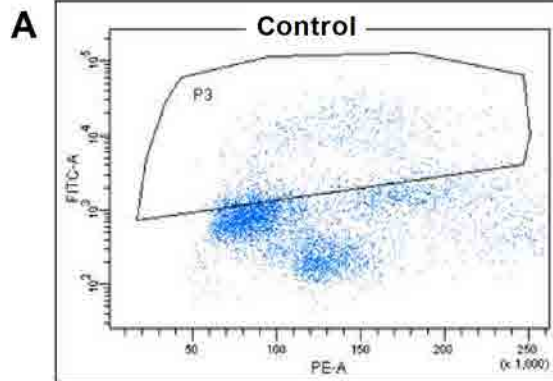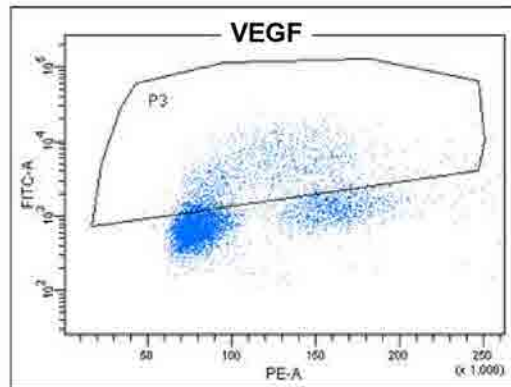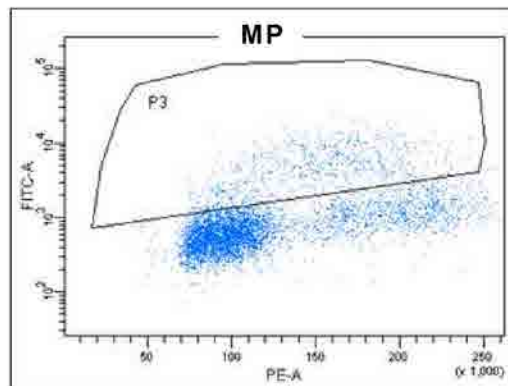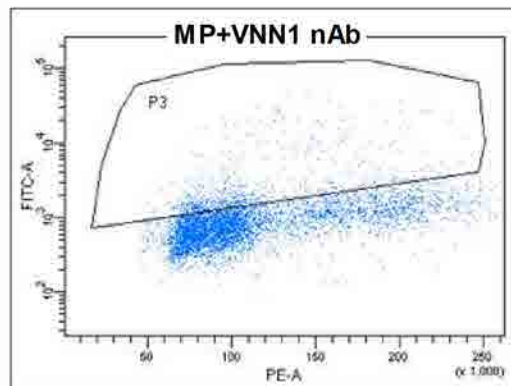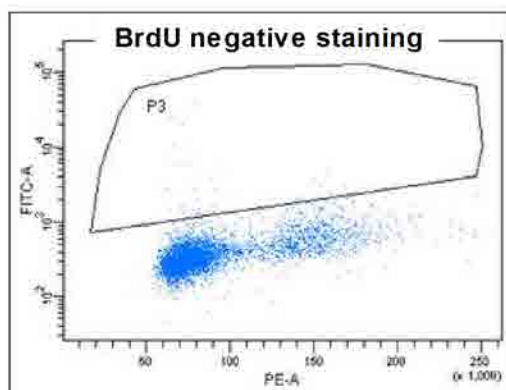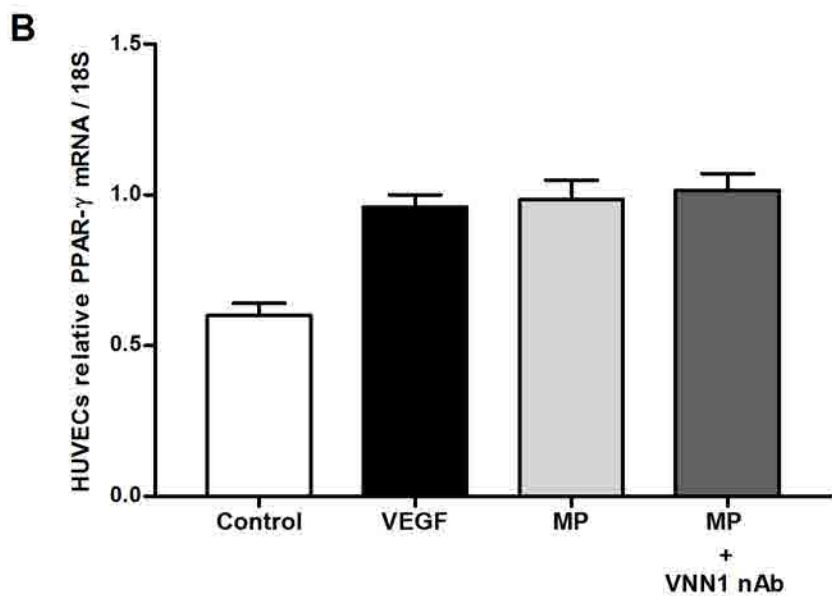

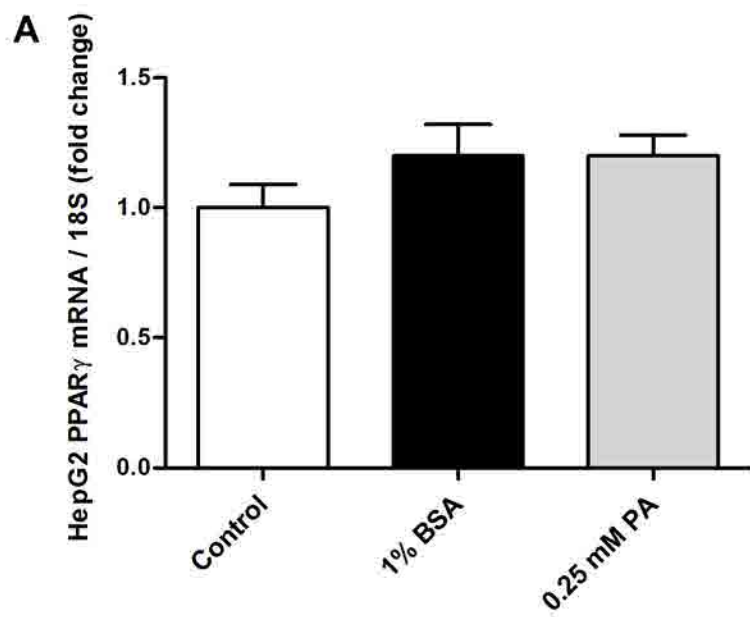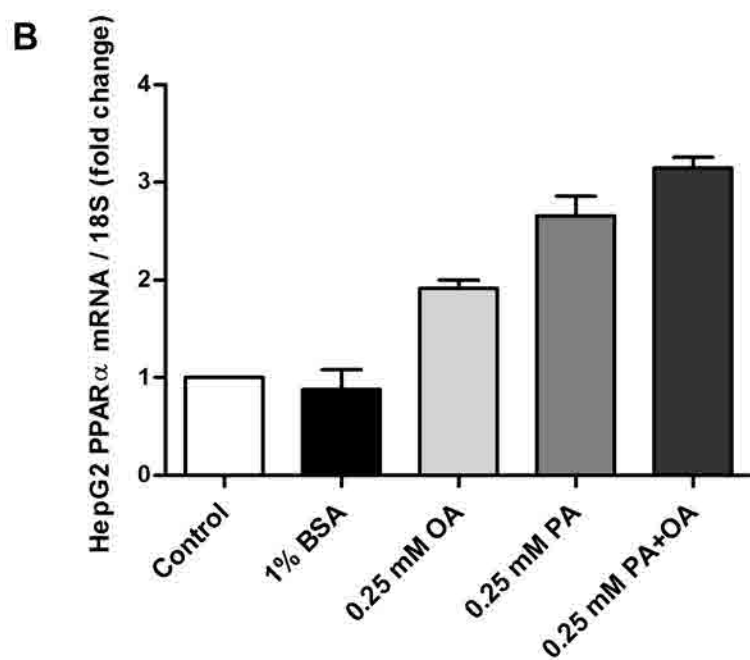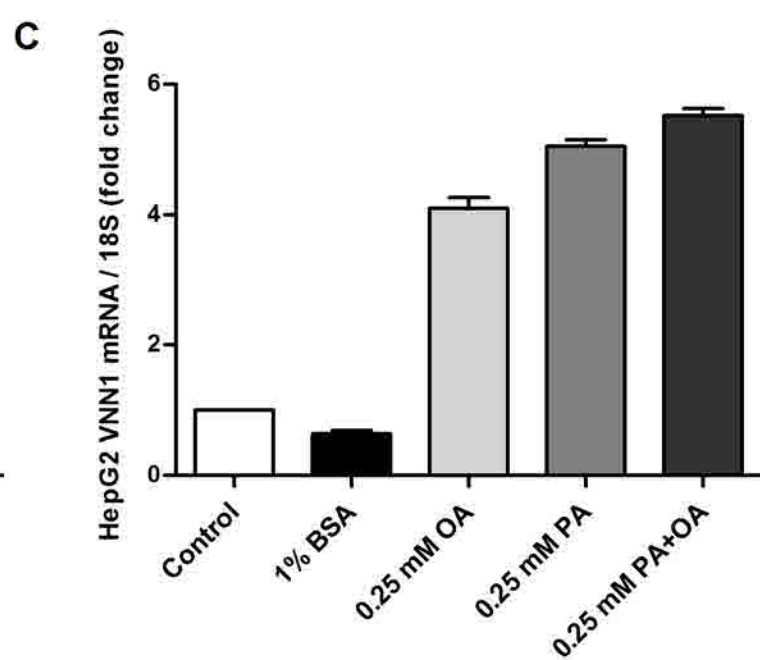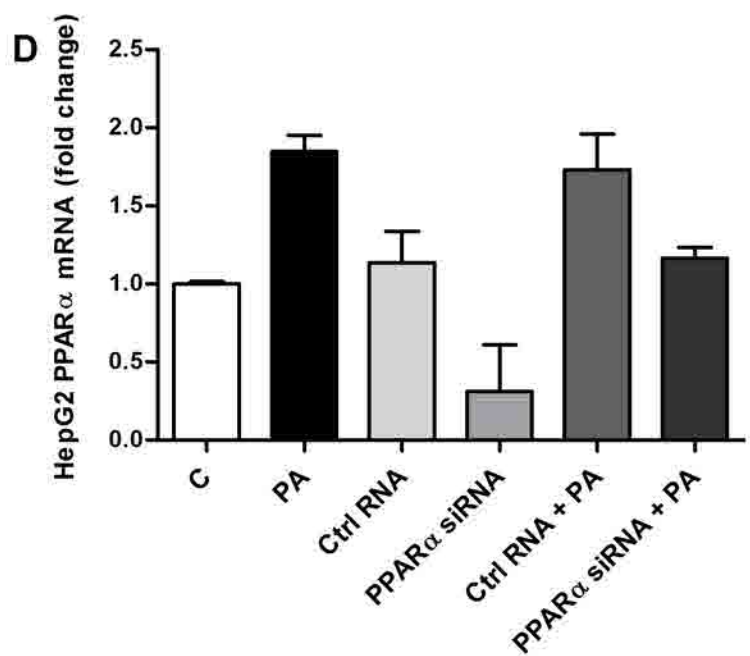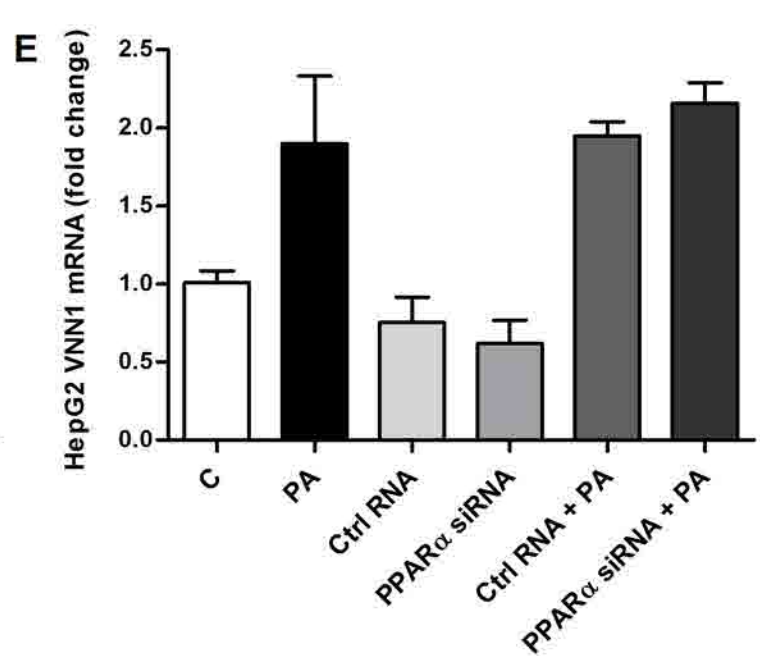

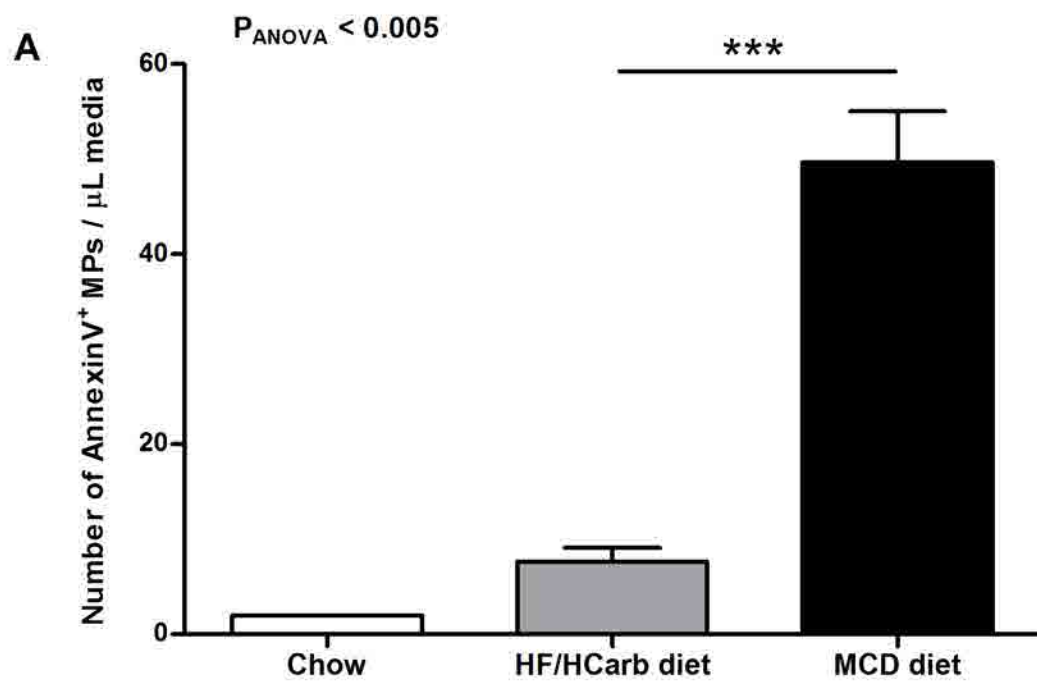

**B**

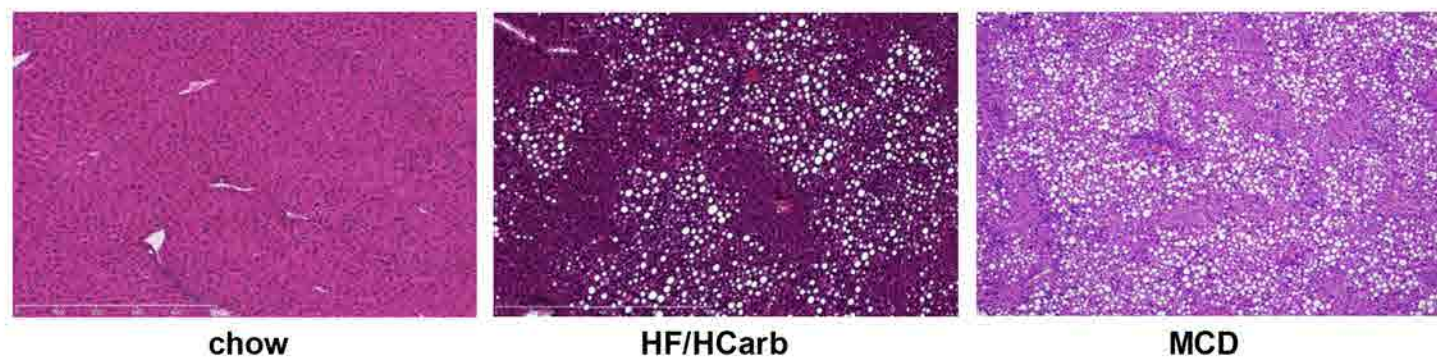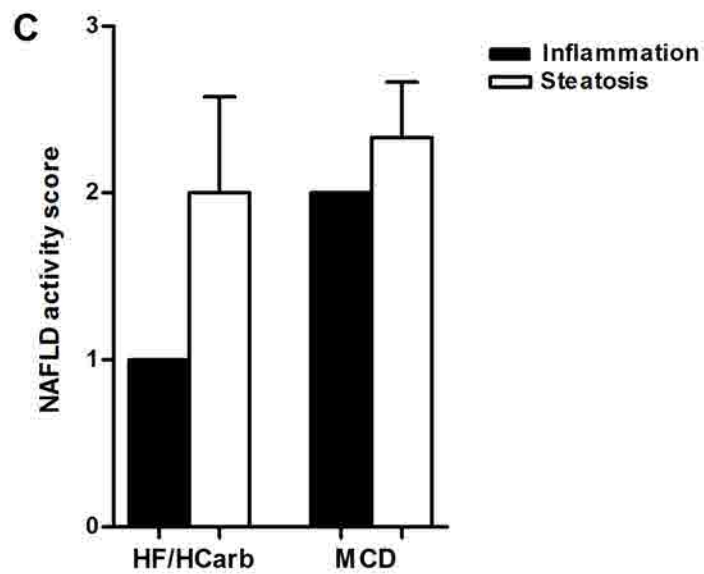



**A**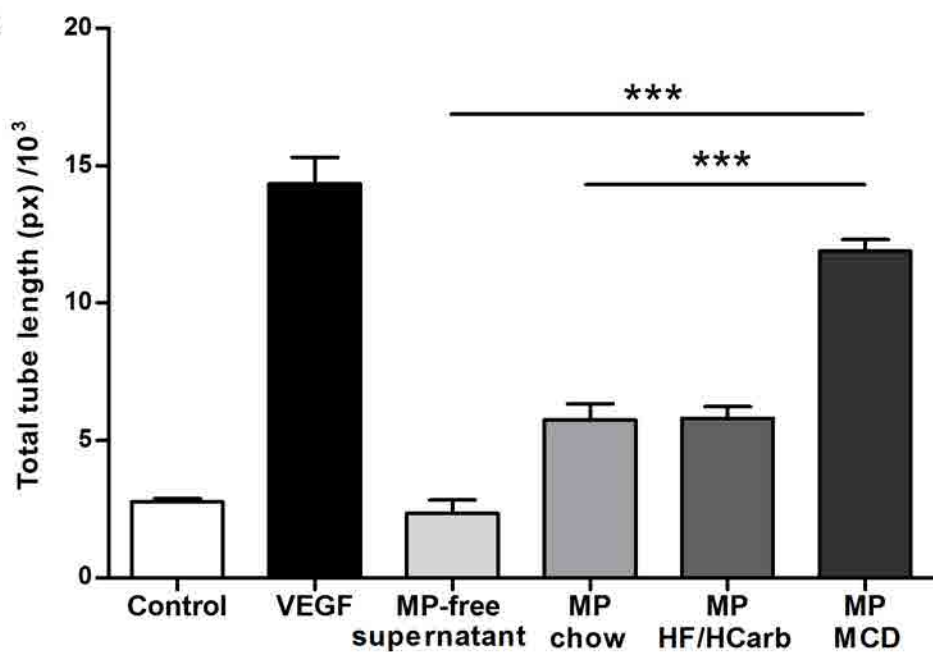**B**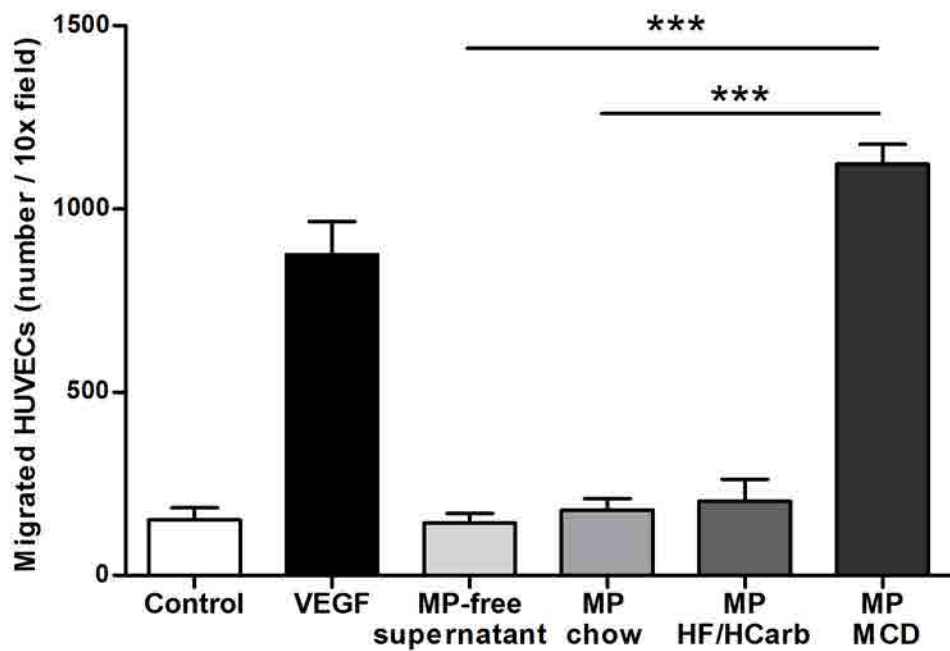

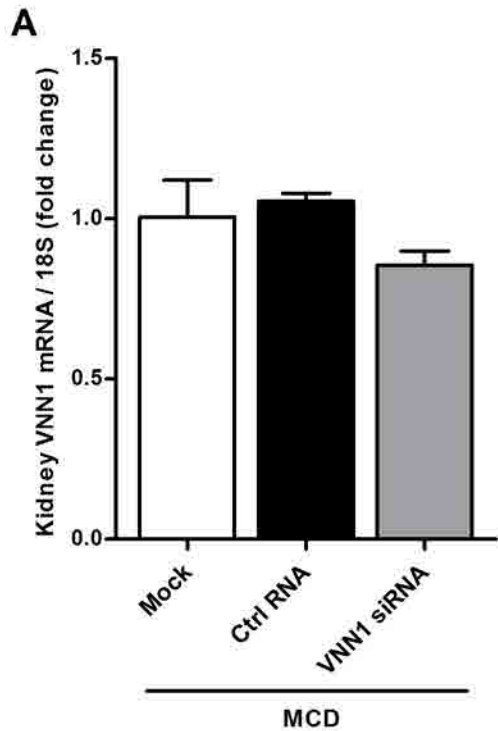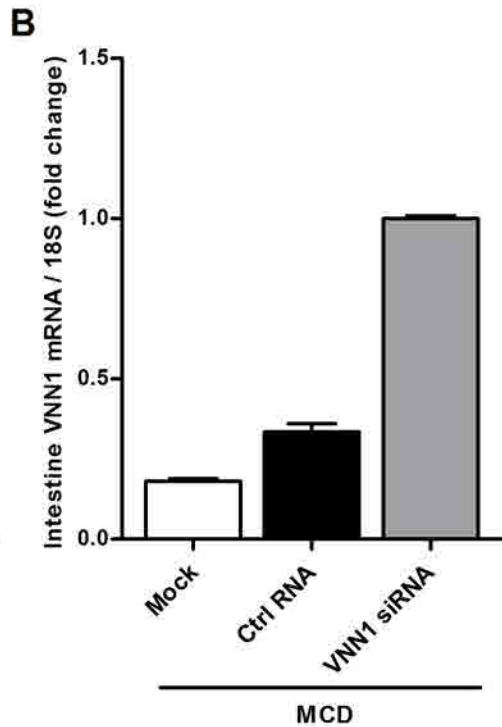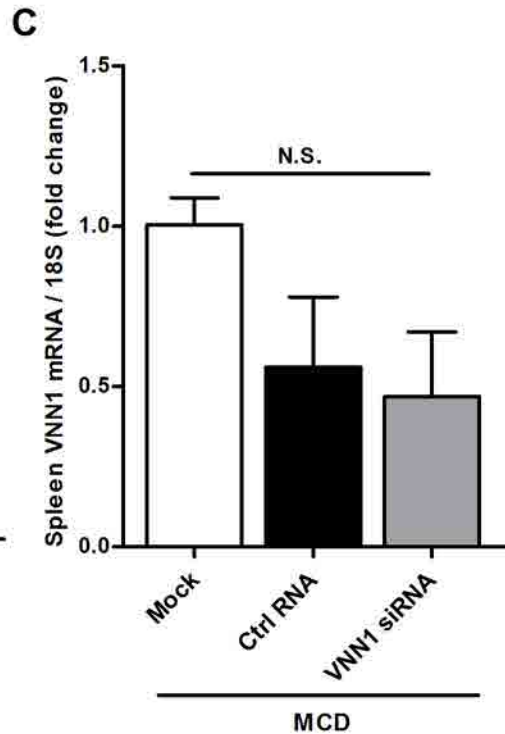

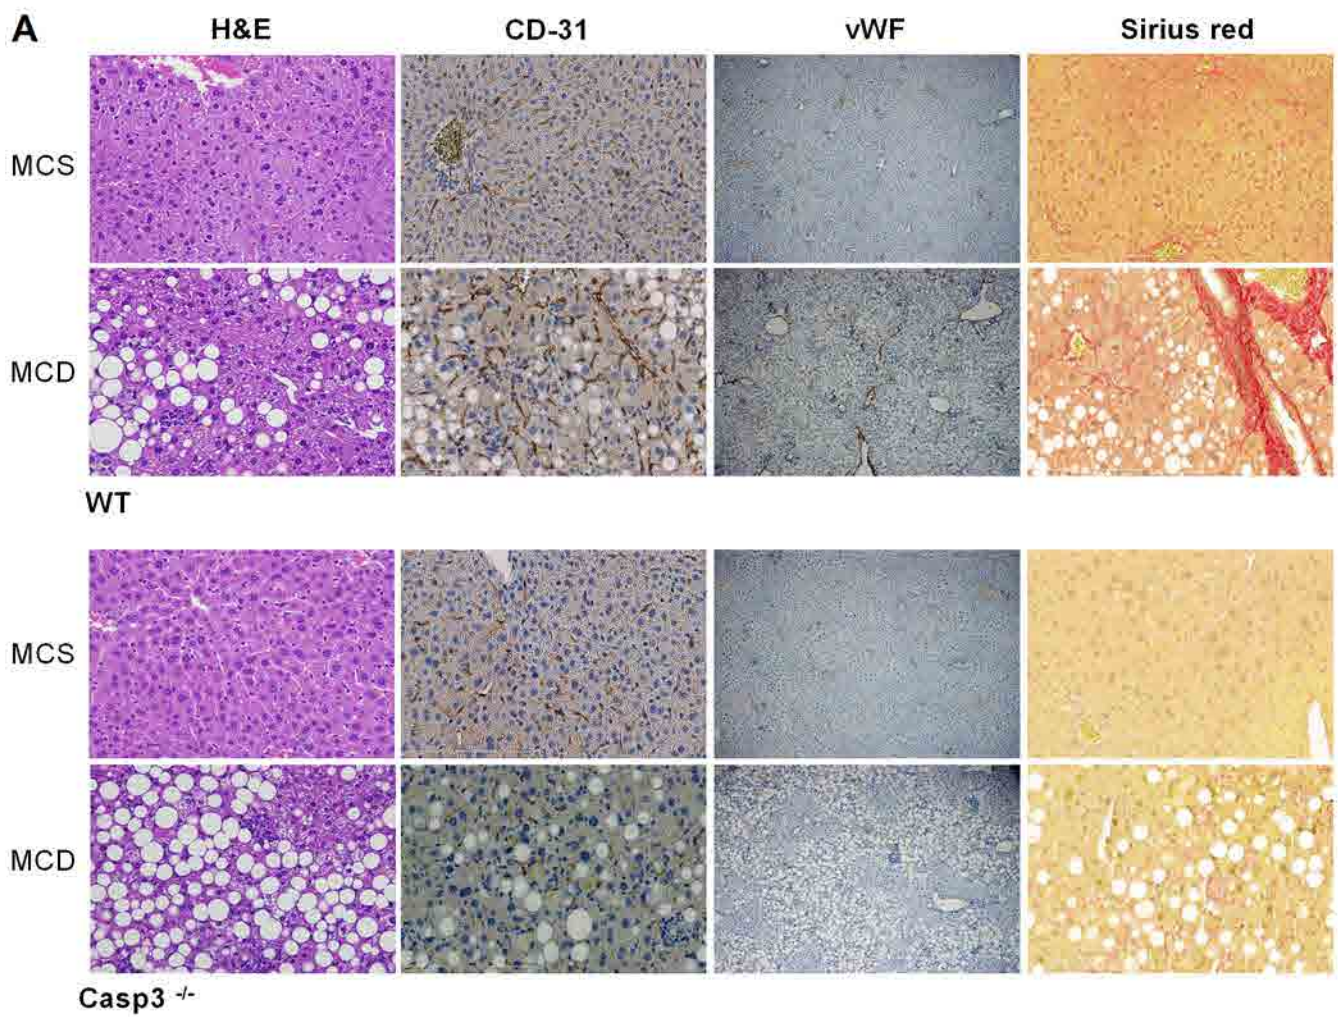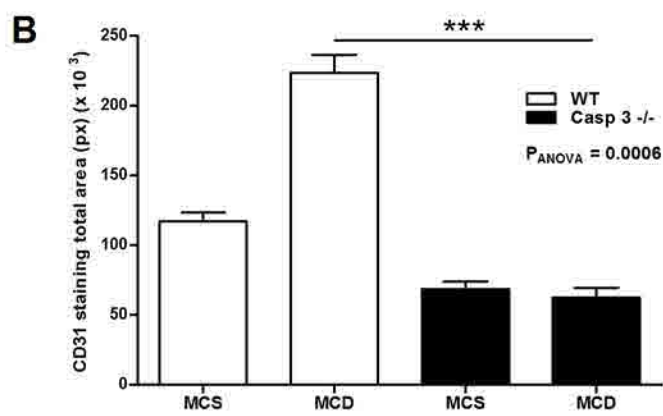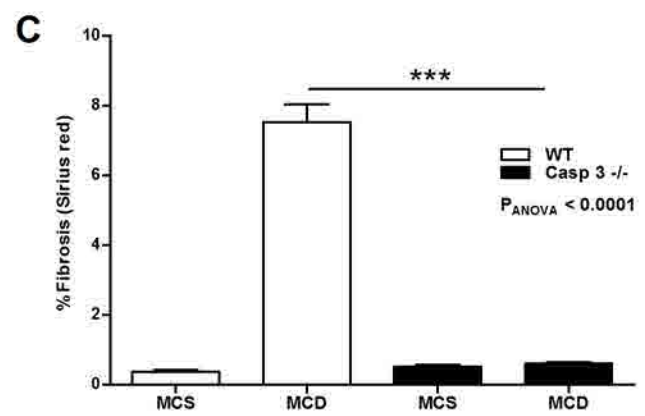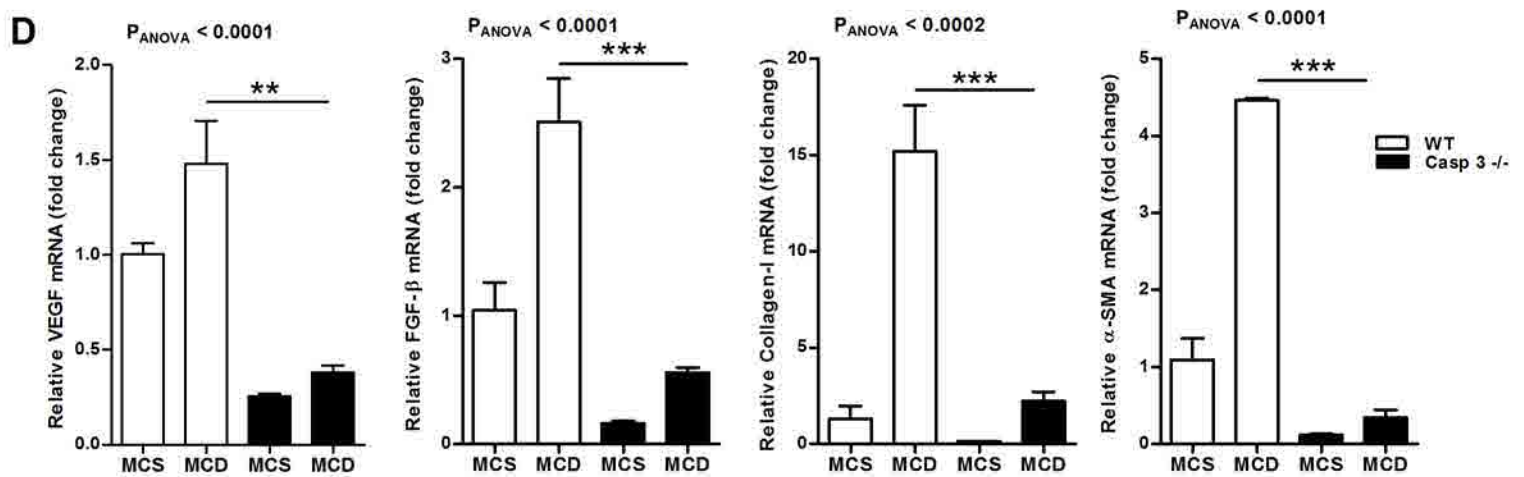

**Supplementary Table 1. Identification of the whole hepatocytes-derived microparticles proteins based on the LC-MS/MS-derived sequences**

| Protein name                                     | Accession code | Number of peptides | Molecular function | Biological process                                                                             | Cellular localization             |
|--------------------------------------------------|----------------|--------------------|--------------------|------------------------------------------------------------------------------------------------|-----------------------------------|
| <b>CYTOSKELETON / VESICULATION / ENDOCYTOSIS</b> |                |                    |                    |                                                                                                |                                   |
| Tubulin, alpha, ubiquitous                       | gi 57013276    | 2                  | Nucleotide binding | Cytoskeleton organisation<br>Mitosis / transport / protein folding / cytoskeleton organisation | Cytoplasm                         |
| Tubulin, alpha 1a                                | gi 17986283    | 2                  | Nucleotide binding | Cytoskeleton organisation                                                                      | Cytoplasm                         |
| Tubulin alpha 6                                  | gi 14389309    | 2                  | Nucleotide binding | Cytoskeleton organisation                                                                      | Cytoplasm                         |
| Tubulin, alpha 3e                                | gi 46409270    | 1                  | Nucleotide binding | Cytoskeleton organisation                                                                      | Cytoplasm                         |
| Tubulin, alpha 3c                                | gi 17921993    | 1                  | Nucleotide binding | Cytoskeleton organisation                                                                      | Cytoplasm                         |
| Tubulin, alpha 3d                                | gi 156564363   | 1                  | Nucleotide binding | Cytoskeleton organisation                                                                      | Cytoplasm                         |
| Tubulin, beta, 2                                 | gi 5174735     | 1                  | Nucleotide binding | Cytoskeleton organisation                                                                      | Cytoplasm                         |
| Tubulin, beta                                    | gi 29788785    | 1                  | Nucleotide binding | Cytoskeleton organisation                                                                      | Cytoplasm                         |
| Tubulin, beta 8                                  | gi 42558279    | 1                  | Nucleotide binding | Cytoskeleton organisation                                                                      | Cytoplasm                         |
| Tubulin, beta 2B                                 | gi 29788768    | 1                  | Nucleotide binding | Cytoskeleton organisation                                                                      | Cytoplasm                         |
| Tubulin, beta 4                                  | gi 21361322    | 1                  | Nucleotide binding | Cytoskeleton organisation                                                                      | Cytoplasm                         |
| Tubulin, beta polypeptide 4, member Q            | gi 55770868    | 1                  | Nucleotide binding | Cytoskeleton organisation                                                                      | Cytoplasm                         |
| Tubulin, beta 6                                  | gi 14210536    | 1                  | Nucleotide binding | Cytoskeleton organisation                                                                      | Cytoplasm                         |
| <b>ENZYMES / METABOLIC PROCESSES</b>             |                |                    |                    |                                                                                                |                                   |
| Albumin precursor                                | gi 4502027     | 42                 | Protein binding    | Transport / response to stress / lipid metabolism                                              | Extracellular space/<br>cytoplasm |
| Maltase-glucoamylase                             | gi 4758712     | 25                 | Glucosidase        | Carbohydrate metabolism                                                                        | Plasma membrane                   |
| Ceruloplasmin precursor                          | gi 4557485     | 55                 | Ferroxidase        | Ion transport                                                                                  | Extracellular space               |

|                                                    |             |    |                                    |                                                                         |                                                   |
|----------------------------------------------------|-------------|----|------------------------------------|-------------------------------------------------------------------------|---------------------------------------------------|
| Apolipoprotein E precursor                         | gi 4557325  | 6  | Lipid/protein binding              | Lipid metabolism                                                        | Extracellular space / cytoplasm                   |
| Amine oxidase, copper containing 3 precursor       | gi 4502119  | 12 | Oxidase / binding                  | Catecholamine metabolism / adhesion / inflammation                      | Cytoplasm / plasma membrane                       |
| Vitamin D-binding protein precursor                | gi 32483410 | 7  | Protein binding                    | Vitamin D transport                                                     | Extracellular space                               |
| Isocitrate dehydrogenase 1 (NADP+), soluble        | gi 28178825 | 4  | Dehydrogenase                      | Isocitrate oxidative decarboxylation                                    | Cytoplasm / mitochondrion / peroxisome            |
| Fumarylacetoacetate hydrolase                      | gi 4557587  | 5  | Hydrolase                          | Tyrosine catabolism                                                     | Cytoplasm                                         |
| Apolipoprotein A-I preproprotein                   | gi 4557321  | 3  | Lipid/protein binding              | Lipid metabolism / platelet activation / endothelial cell proliferation | Extracellular space / cytoplasm / plasma membrane |
| Vanin-1 precursor                                  | gi 4759312  | 3  | Hydrolase / GPI anchor binding     | Inflammatory response / anti-apoptosis / adhesion / cell migration      | Plasma membrane                                   |
| Eukaryotic translation elongation factor 1 alpha 1 | gi 4503471  | 2  | Nucleotide binding                 | Transcription / translation regulation                                  | Cytoplasm / Nucleus                               |
| Clustein isoform 2                                 | gi 42740907 | 2  | ATPase / misfolded protein binding | Apoptosis regulation                                                    | Extracellular space / cytoplasm / mitochondrion   |
| Clusterin isoform 1                                | gi 42716297 | 2  | ATPase / misfolded protein binding | Apoptosis regulation                                                    | Extracellular space / cytoplasm / mitochondrion   |
| Haptoglobin                                        | gi 4826762  | 2  | Catalytic activity                 | Hemoglobin binding / catabolic process                                  | Extracellular space                               |
| Haptoglobin-related protein                        | gi 45580723 | 1  | Catalytic activity                 | Hemoglobin binding                                                      | Extracellular space                               |
| Glyceraldehyde-3-phosphate dehydrogenase           | gi 7669492  | 3  | Dehydrogenase                      | Glycolysis                                                              | Cytoplasm                                         |
| Dipeptidylpeptidase IV                             | gi 18765694 | 1  | Aminopeptidase                     | Endothelial cell migration / adhesion / proteolysis                     | Plasma membrane / Golgi apparatus                 |
| Alpha 1 globin                                     | gi 4504347  | 1  | Transporter                        | Oxygen transport                                                        | Extracellular space                               |
| Alpha 2 globin                                     | gi 4504345  | 1  | Transporter                        | Oxygen transport                                                        | Extracellular space                               |

|                                                                                 |             |   |                               |                                         |                                       |
|---------------------------------------------------------------------------------|-------------|---|-------------------------------|-----------------------------------------|---------------------------------------|
| Plasma glutamate carboxypeptidase                                               | gi 7706387  | 3 | Peptidase                     | Proteolysis                             | Cytoplasm / plasma membrane / nucleus |
| Eukaryotic translation elongation factor 1 alpha 2                              | gi 4503475  | 1 | Nucleotide binding            | Translation / anti-apoptosis            | Cytoplasm / nucleus                   |
| Hornerin                                                                        | gi 57864582 | 3 | Isomerase                     | Tryptophan metabolic process            | Extracellular space                   |
| Aspartate aminotransferase 1                                                    | gi 4504067  | 1 | Transaminase                  | Amino acid degradation and biosynthesis | Cytoplasm                             |
| Lysozyme precursor Serine (or cysteine) proteinase inhibitor, clade A, member 7 | gi 4557894  | 1 | Hydrolase / Lysozyme activity | Inflammatory response / cytolysis       | Extracellular space                   |
|                                                                                 | gi 4507377  | 1 | Protein binding               | Regulation of proteolysis               | Extracellular space                   |

## RIBONUCLEOPROTEINS

|                       |            |   |                 |             |         |
|-----------------------|------------|---|-----------------|-------------|---------|
| Ribosomal protein S10 | gi 4506679 | 1 | Protein binding | Translation | Nucleus |
|-----------------------|------------|---|-----------------|-------------|---------|

## EXTRACELLULAR MATRIX

|                                                 |             |   |                              |                                                     |                     |
|-------------------------------------------------|-------------|---|------------------------------|-----------------------------------------------------|---------------------|
| Transforming growth factor, beta-induced, 68kDa | gi 4507467  | 3 | Extracellular matrix binding | Angiogenesis / cell adhesion                        | Extracellular space |
| Vitronectin precursor                           | gi 88853069 | 2 | Extracellular matrix binding | Cell-matrix adhesion / migration / integrin binding | Extracellular space |

## NUCLEOSOMES

|                        |             |   |             |                     |         |
|------------------------|-------------|---|-------------|---------------------|---------|
| Histone cluster 2, H4b | gi 77539758 | 2 | DNA binding | Nucleosome assembly | Nucleus |
| Histone cluster 2, H4a | gi 4504323  | 2 | DNA binding | Nucleosome assembly | Nucleus |
| Histone cluster 1, H4i | gi 4504321  | 2 | DNA binding | Nucleosome assembly | Nucleus |
| Histone cluster 1, H4l | gi 4504317  | 2 | DNA binding | Nucleosome assembly | Nucleus |
| Histone cluster 1, H4e | gi 4504315  | 2 | DNA binding | Nucleosome assembly | Nucleus |
| Histone cluster 1, H4b | gi 4504313  | 2 | DNA binding | Nucleosome assembly | Nucleus |
| Histone cluster 1, H4h | gi 4504311  | 2 | DNA binding | Nucleosome assembly | Nucleus |
| Histone cluster 1, H4c | gi 4504309  | 2 | DNA binding | Nucleosome assembly | Nucleus |
| Histone cluster 1, H4k | gi 4504307  | 2 | DNA binding | Nucleosome assembly | Nucleus |
| Histone cluster 1, H4f | gi 4504305  | 2 | DNA binding | Nucleosome assembly | Nucleus |

|                         |             |   |             |                     |         |
|-------------------------|-------------|---|-------------|---------------------|---------|
| Histone cluster 1, H4d  | gi 4504303  | 2 | DNA binding | Nucleosome assembly | Nucleus |
| Histone cluster 1, H4a  | gi 4504301  | 2 | DNA binding | Nucleosome assembly | Nucleus |
| Histone cluster 4, H4   | gi 28173560 | 2 | DNA binding | Nucleosome assembly | Nucleus |
| Histone cluster 1, H4j  | gi 11415030 | 2 | DNA binding | Nucleosome assembly | Nucleus |
| Histone cluster 2, H2be | gi 4504277  | 2 | DNA binding | Nucleosome assembly | Nucleus |
| Histone cluster 3, H2bb | gi 28173554 | 2 | DNA binding | Nucleosome assembly | Nucleus |
| Histone cluster 1, H2bj | gi 20336754 | 2 | DNA binding | Nucleosome assembly | Nucleus |
| Histone cluster 1, H2bo | gi 16306566 | 2 | DNA binding | Nucleosome assembly | Nucleus |
| Histone cluster 1, H2bb | gi 10800140 | 2 | DNA binding | Nucleosome assembly | Nucleus |
| Histone cluster 2, H2bf | gi 66912162 | 1 | DNA binding | Nucleosome assembly | Nucleus |
| Histone cluster 1, H2bi | gi 4504271  | 1 | DNA binding | Nucleosome assembly | Nucleus |
| Histone cluster 1, H2bh | gi 4504269  | 1 | DNA binding | Nucleosome assembly | Nucleus |
| Histone cluster 1, H2bf | gi 4504265  | 1 | DNA binding | Nucleosome assembly | Nucleus |
| Histone cluster 1, H2bm | gi 4504263  | 1 | DNA binding | Nucleosome assembly | Nucleus |
| Histone cluster 1, H2bn | gi 4504261  | 1 | DNA binding | Nucleosome assembly | Nucleus |
| Histone cluster 1, H2bl | gi 4504259  | 1 | DNA binding | Nucleosome assembly | Nucleus |
| Histone cluster 1, H2bg | gi 4504257  | 1 | DNA binding | Nucleosome assembly | Nucleus |
| Histone cluster 1, H2be | gi 21396484 | 1 | DNA binding | Nucleosome assembly | Nucleus |
| Histone cluster 1, H2bc | gi 21166389 | 1 | DNA binding | Nucleosome assembly | Nucleus |
| Histone cluster 1, H2bd | gi 20336752 | 1 | DNA binding | Nucleosome assembly | Nucleus |
| Histone cluster 1, H2bk | gi 18105048 | 1 | DNA binding | Nucleosome assembly | Nucleus |

## OTHER PROTEINS

|                                                             |              |   |                                     |                                                                      |                     |
|-------------------------------------------------------------|--------------|---|-------------------------------------|----------------------------------------------------------------------|---------------------|
| Fibrinogen, alpha polypeptide isoform alpha-E preproprotein | gi 4503689   | 1 | Protein binding                     | Coagulation                                                          | Extracellular space |
| Fibrinogen, alpha polypeptide isoform alpha preproprotein   | gi 11761629  | 1 | Protein binding                     | Coagulation<br>Chemotaxis /<br>inflammation / signal<br>transduction | Extracellular space |
| Chemokine (C-C motif) ligand 20                             | gi 4759076   | 1 | Chemokine                           | Inflammation response /<br>apoptosis                                 | Extracellular space |
| Growth differentiation factor 15                            | gi 153792495 | 1 | Growth factor (TGF- $\beta$ family) |                                                                      | Cytoplasm           |
